# Supplementary material for: Chemotherapeutic Efficacy of Implantable Antineoplastic-Treatment Protocols in an Optimal Mouse Model for Human Ovarian Carcinoma Cell Targeting
Source: PubMed Central journal article supplement (PMC6213745; doi:10.3390/ijms19103030), 2018-10-04
Supplement: ijms-19-03030-s001.pdf [file ijms-19-03030-s001.pdf]

# Chemotherapeutic Efficacy of Implantable Antineoplastic-Treatment Protocols in an Optimal Mouse Model for Human Ovarian Carcinoma Cell Targeting

Jonathan M. Pantshwa <sup>1</sup>, Khadija Rhoda <sup>1</sup>, Sarah J. Clift <sup>2</sup>, Priyamvada Pradeep <sup>1</sup>, Yahya E. Choonara <sup>1</sup>, Pradeep Kumar <sup>1</sup>, Lisa C. du Toit <sup>1</sup>, Clement Penny <sup>3</sup> and Viness Pillay <sup>1\*</sup>

<sup>1</sup>Wits Advanced Drug Delivery Platform Research Unit, Department of Pharmacy and Pharmacology, Faculty of Health Sciences, School of Therapeutics Sciences, University of the Witwatersrand, Johannesburg, 7 York Road, Parktown 2193, South Africa; [monwabisi.pantshwa@wits.ac.za](mailto:monwabisi.pantshwa@wits.ac.za) (J.M.P.); [khadija.rhoda@students.wits.ac.za](mailto:khadija.rhoda@students.wits.ac.za) (K.R.); [priyamvada.pradeep@wits.ac.za](mailto:priyamvada.pradeep@wits.ac.za) (P.P.); [yahya.choonara@wits.ac.za](mailto:yahya.choonara@wits.ac.za) (Y.E.C.); [pradeep.kumar@wits.ac.za](mailto:pradeep.kumar@wits.ac.za) (P.K.); [lisa.dutoit@wits.ac.za](mailto:lisa.dutoit@wits.ac.za) (L.C.d.T.)

<sup>2</sup>Department of Paraclinical Sciences, Faculty of Veterinary Science, University of Pretoria, Onderstepoort, South Africa; [sarah.clift@up.ac.za](mailto:sarah.clift@up.ac.za) (S.J.C.);

<sup>3</sup> Department of Medical Oncology, Division of Oncology, Faculty of Health Sciences, University of the Witwatersrand, Johannesburg, 7 York Road, Parktown,2193, South Africa; [clement.penny@wits.ac.za](mailto:clement.penny@wits.ac.za) (C.P.)

\*Correspondence: [viness.pillay@wits.ac.za](mailto:viness.pillay@wits.ac.za); Tel.: +27-11-717-2274

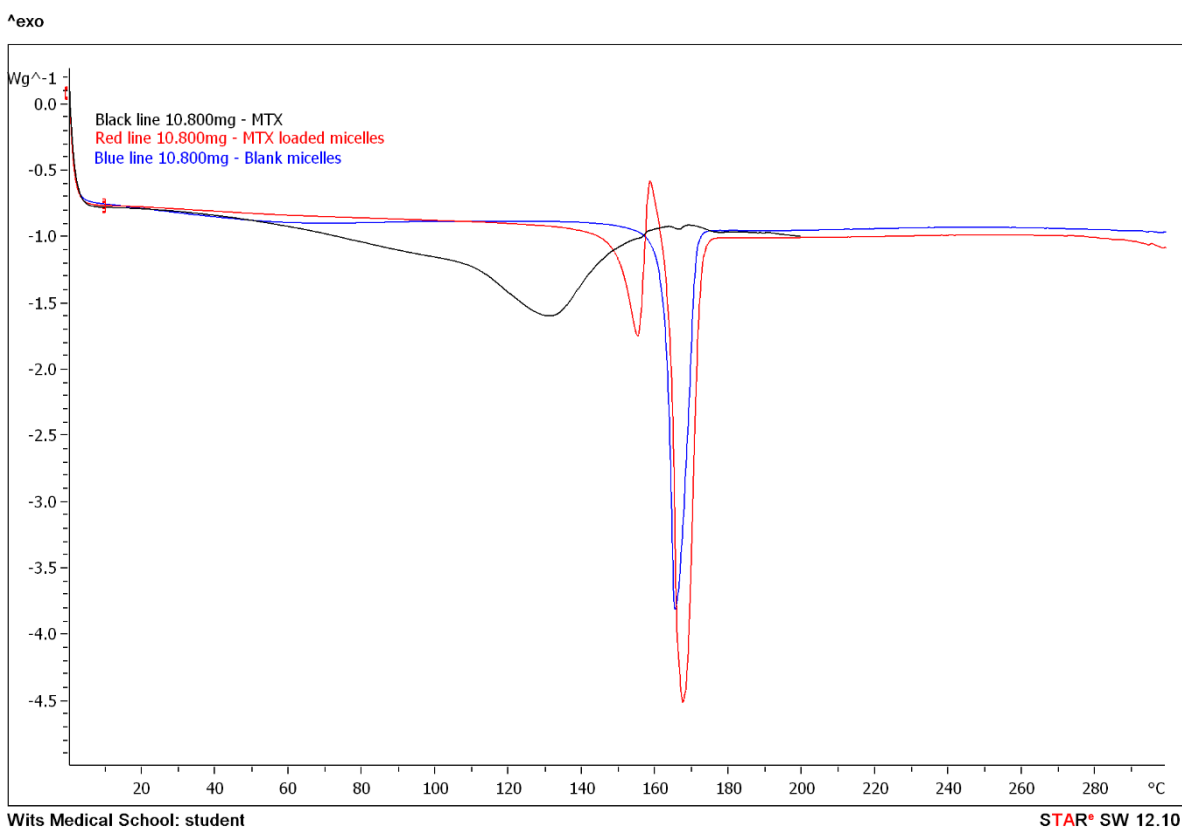

**Figure S1.** DSC thermograms of pure MTX (black graph), blank micelle nanoformulation (blue graph), MTX-loaded micelle formulation (red graph) demonstrating temperature variations and shifts in the curves.

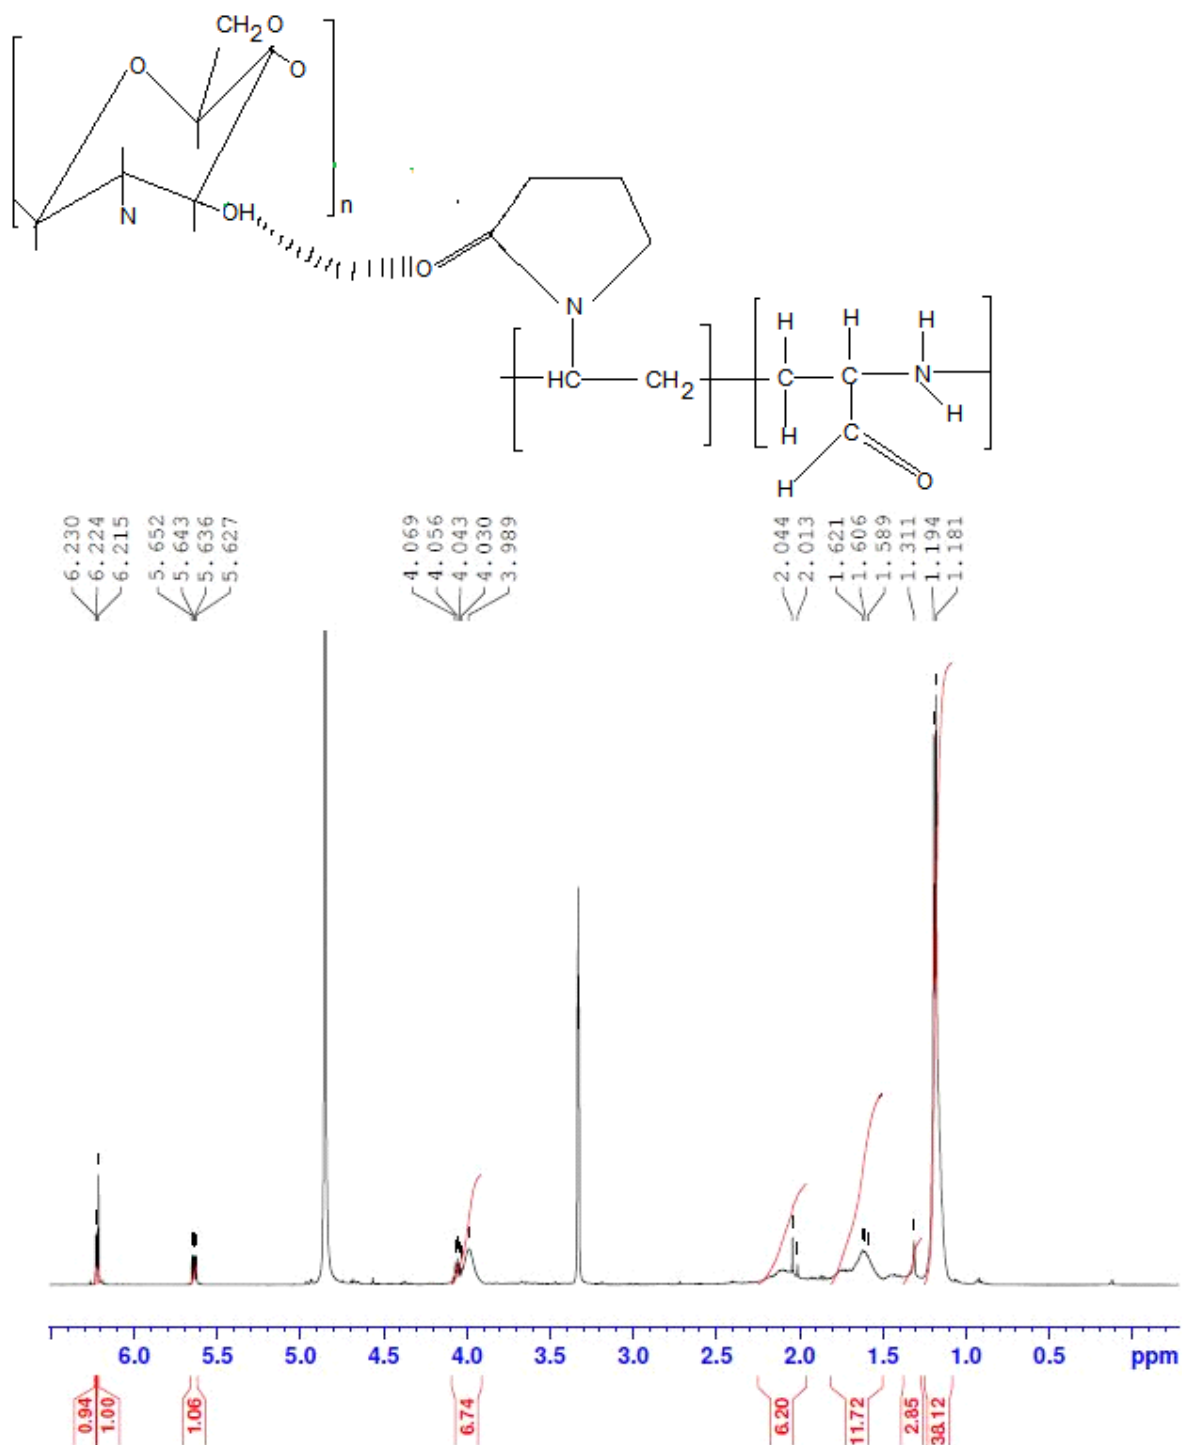

**Figure S2:** <sup>1</sup>H NMR spectra of CHT-PVP-PNIPAAm hydrogel in D<sub>2</sub>O and crest peak assignment affirmative to the synthesized composite C-P-N structure.

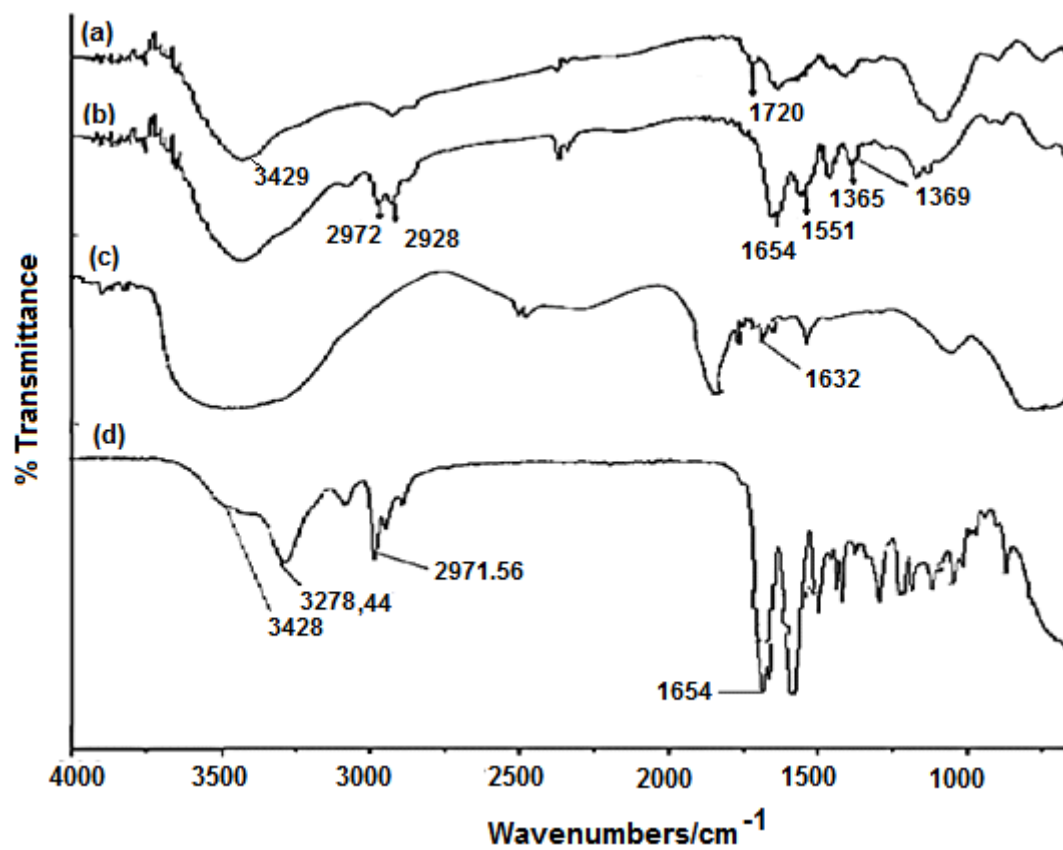

**Figure S3:** Vibrational-Spectroscopy-FTIR of Chitosan (a), PNIPAAm (b), PVP (c) and combinational CHT-PVP-PNIPAAm hydrogel (d).

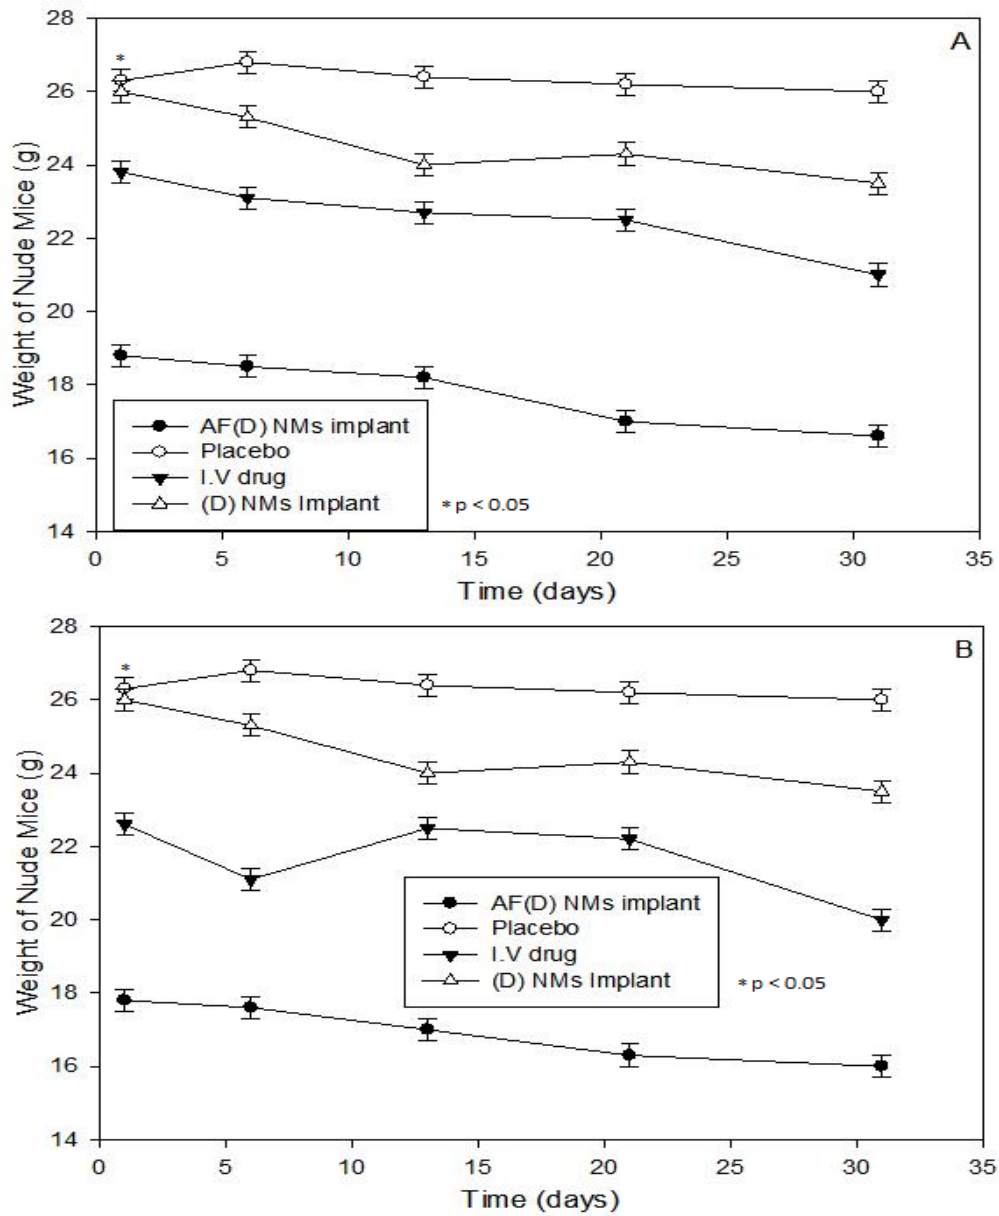

**Figure S4.** Nude mice average body weight curves illustrating chemotherapeutic efficacy in the 3 treatments and control (placebo) group. A refers to the methotrexate- and B the cisplatin-loaded PNIPAAm-b-PASP nanomicelle implant delivery system in NIH:OVCAR-5 EOC-bearing nude mice. Each point depicts mean (n=10/group); bar,  $\pm$ SD. \*:  $p < 0.05$  by t-test.
